# Supplementary material
Source: PubMed Central journal article supplement (PMC4868955)
Supplement: EMBJ-35-1045-s001.pdf [file EMBJ-35-1045-s001.pdf]

## Expanded View Figures

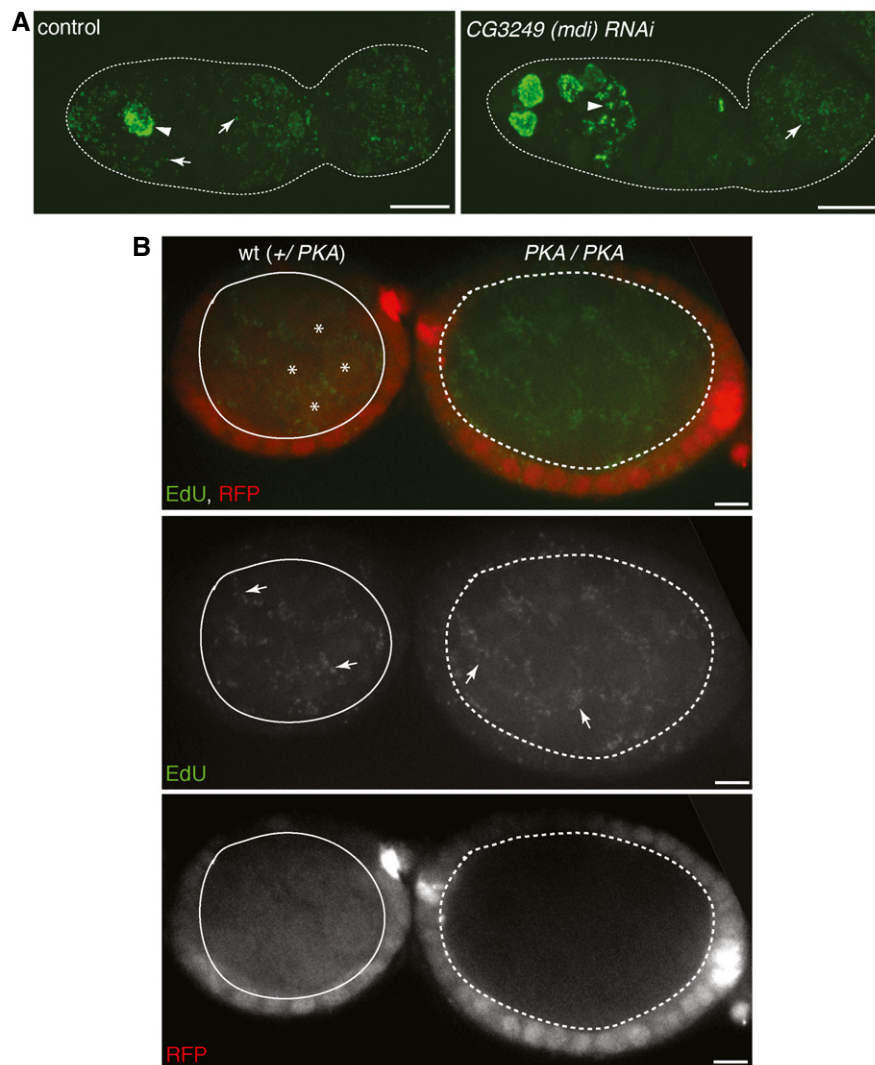

**Figure EV1. mtDNA replication in *mdi* RNAi and *PKA* mutant ovaries.**

**A** DNA replication illustrated by EdU incorporation in ovaries of control and *mdi* RNAi flies. Arrows point to mitochondria and arrowheads point to nuclei. Genotypes: *UAS-dicer; nos-gal4* (control); *UAS-dicer; nos-gal4; UAS-CG3249<sup>IR</sup>* [*CG3249 (mdi) RNAi*]. mtDNA replication is inhibited in late germarium stage in the ovariole expressing *mdi* RNAi. Scale bars, 10  $\mu$ m.

**B** mtDNA replication in wt and *PKA* mutant clones illustrated by EdU incorporation. Arrows point to mtDNA replication. wt clones (solid circle) are labeled with a nuclear-localized RFP reporter (\*). *pka* null mutant clones that lack RFP signal (dashed circle) display normal mtDNA replication (arrows). Scale bars, 10  $\mu$ m.

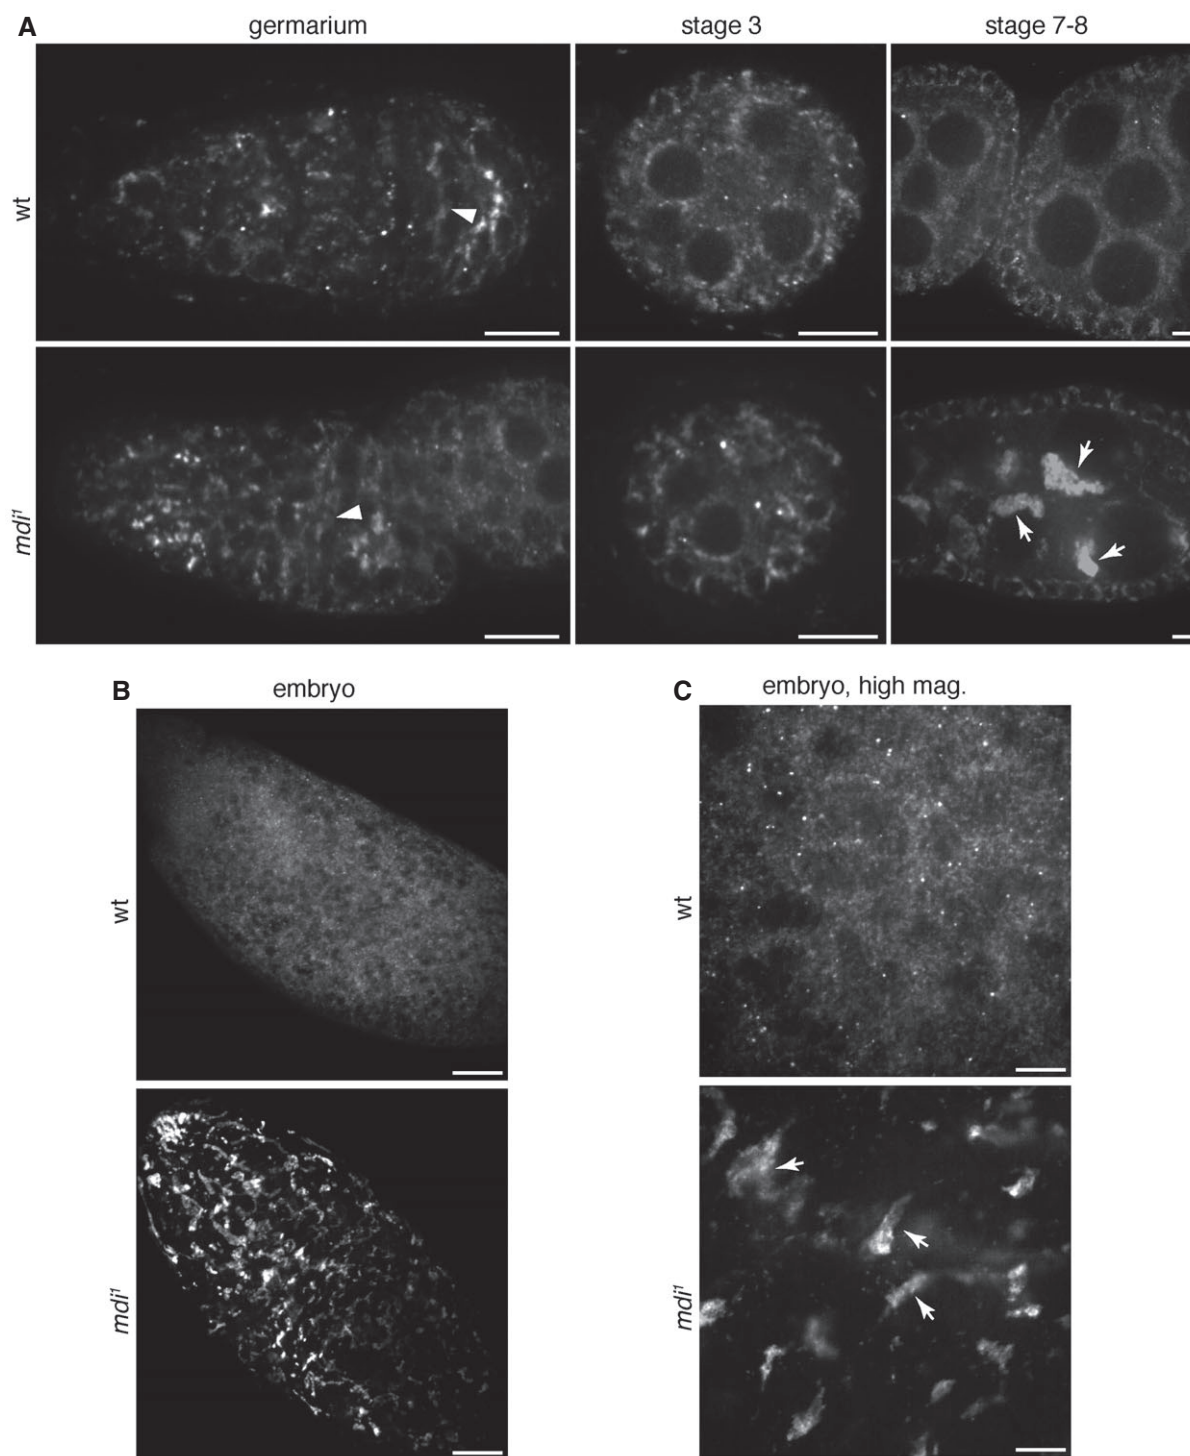

**Figure EV2. Mitochondria are clumped together in the *mdi<sup>2</sup>* ovary and their eggs.**

A Representative images of wt and *mdi<sup>2</sup>* ovarioles stained for ATP-S, illustrating mitochondrial morphology. Note that mitochondria progressively clump together in mid- to late-stage egg chambers of *mdi<sup>2</sup>* flies. Scale bars, 10  $\mu$ m.

B Representative images wt and *mdi<sup>2</sup>* eggs stained for ATP-S, illustrating mitochondrial morphology. Scale bars, 100  $\mu$ m.

C High-mag images of wt and *mdi<sup>2</sup>* eggs stained for ATP-S. Scale bars, 20  $\mu$ m. Note the clumping mitochondria in eggs produced by *mdi<sup>2</sup>* flies.

Data information: Arrowheads point to the mitochondria that normally associate with fusome in wt and *mdi<sup>2</sup>* ovarioles. Arrows point to clumped mitochondria in *mdi<sup>2</sup>* ovarioles and eggs.

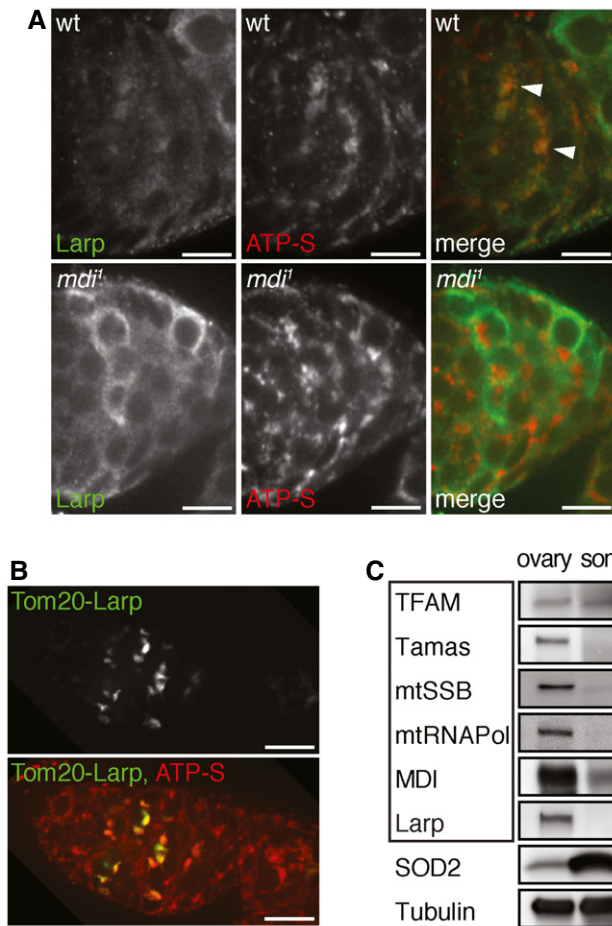

**Figure EV3. Larp localization in ovaries and expression of mitochondrial proteins in ovary and somatic tissues.**

**A** Wild-type and *mdi*<sup>1</sup> germaria were stained for Larp (green) and ATP-S (red) to reveal mitochondria. Note that Larp closely associates with mitochondria in wt germarium (arrowheads). Mitochondria in *mdi*<sup>1</sup> flies completely lack Larp staining. Scale bars, 10  $\mu$ m.

**B** Tom20-LarpGFP (Tom20-Larp) fusion protein was expressed under the control of *nanos-gal4* in an *mdi*<sup>1</sup> egg chamber that was stained with ATP-S (red) to mark mitochondria. Note that Tom20-Larp is concentrated around mitochondria (ATP-S) in *mdi*<sup>1</sup> background. Scale bars, 10  $\mu$ m.

**C** Western blots of several mitochondrial proteins in ovary and somatic tissues of wild-type flies. Boxed are mtDNA replication factors, including TFAM, mtDNA polymerase (Tamas), mitochondrial single-strand DNA binding protein (mtSSB), mitochondrial RNA polymerase (mtRNAPol), MDI, and Larp. Except for TFAM, most proteins required for mtDNA replication are upregulated in ovary mitochondria. Tubulin was used as a loading control.

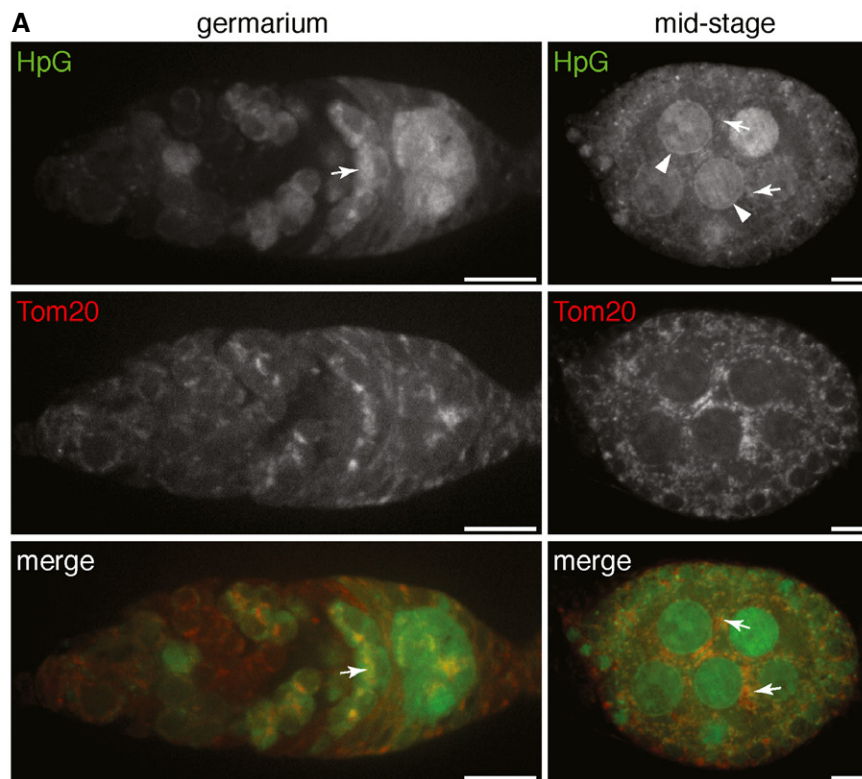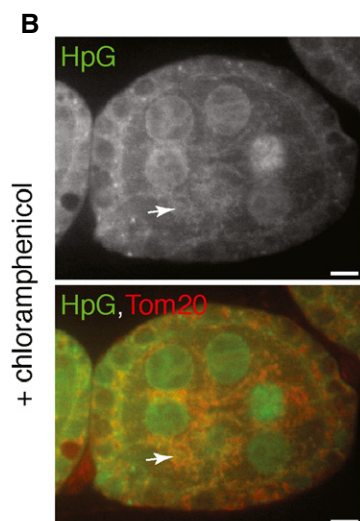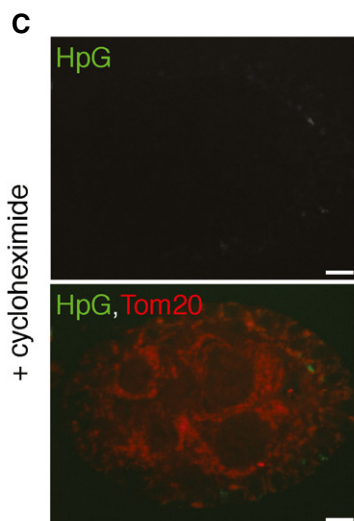

**Figure EV4. Nascent protein synthesis in ovary visualized by HpG incorporation.**

- A** Representative images of ovarioles expressing Tom20-mCherry that were incubated with a methionine analog, L-homopropargylglycine (HpG) for a pulse of 30 min to label the nascent protein synthesis. HpG was visualized with Alexa Fluor 488 through click-it chemistry. Alexa Fluor 488 signal of the nascent protein synthesis was sensitive to detergent wash used in immunostaining assay. Thus, Tom20-mCherry was used to mark mitochondria.
- B** Representative image of HpG incorporation in ovarioles in the presence of chloramphenicol that inhibits mitochondrial ribosomes specifically. Chloramphenicol has no impact on the HpG incorporation in mid-stage egg chamber.
- C** Representative image of HpG incorporation in ovarioles in the presence of cycloheximide that inhibits cytosolic ribosomes. Note that cycloheximide greatly reduces HpG signal.

Data information: Arrows point to the HpG signal associated with mitochondria. Arrowheads point to the HpG signal at perinuclear region. Scale bars in (A–C), 10  $\mu$ m.

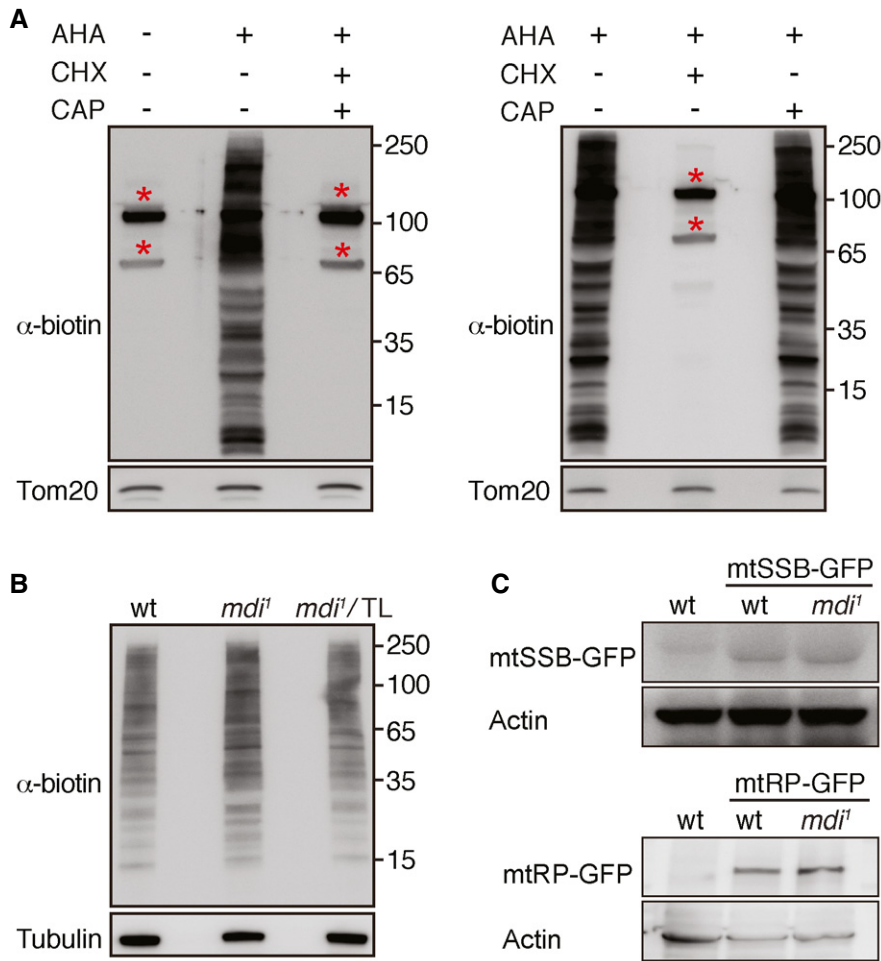

**Figure EV5. Western blot analyses of nascent protein synthesis and steady-state protein levels in ovaries.**

**A** Western blot analyses of nascent protein synthesis in the mitochondrial fraction of the ovary. The nascent protein synthesis was labeled by AHA incorporation and detected by anti-biotin antibody. Tom20 was used as a loading control. There were two strong bands (\*) in the mitochondria fraction without the AHA incubation, indicating two endogenously biotinylated mitochondrial proteins. The AHA signal was mostly blocked in the presence of a cytosolic translation inhibitor, cycloheximide (CHX). Whereas chloramphenicol (CAP) has no impact on the HpG incorporation, indicating the nascent protein synthesis is mainly derived from cytosolic ribosomes associated with mitochondria.

**B** Western blot analyses of nascent protein synthesis in the cytosolic fraction of wt, *mdi<sup>1</sup>*, and *mdi<sup>1</sup>* expressing Tom20-Larp (*mdi<sup>1</sup>/TL*) ovary. Tubulin was used as a loading control. The overall AHA signals indicating the nascent protein synthesis in the three genotypes are comparable.

**C** Western blot analyses of mtSSB-GFP and mtRNApol-GFP (mtRP-GFP) in wt and *mdi<sup>1</sup>* ovary. Actin was used as a loading control.
